# Supplementary material for: Quantitative characterization of metabolism and metabolic shifts during growth of the new human cell line AGE1.HN using time resolved metabolic flux analysis
Source: PubMed Central journal article supplement — Bioprocess Biosyst Eng. 2010 Dec 25;34(5):533–45. doi: 10.1007/s00449-010-0502-y (PMC3092918; doi:10.1007/s00449-010-0502-y), 2010-12-25
Supplement: 449_2010_502_MOESM4_ESM.pdf [file 449_2010_502_MOESM4_ESM.pdf]

**Table S1: Main components of the applied 42-Max-UB medium**

| <b>Component</b>                               | <b>c [mM]</b> |
|------------------------------------------------|---------------|
| Glucose                                        | 22.8          |
| Pyruvate                                       | 1.9           |
| Alanine                                        | 0.5           |
| Arginine                                       | 1.8           |
| Asparagine                                     | 1.0           |
| Aspartic Acid                                  | 2.1           |
| Cysteine                                       | 0.3           |
| Glutamic Acid                                  | 0.7           |
| Glutamine                                      | 5.9           |
| Glycine                                        | 1.4           |
| Histidine                                      | 0.8           |
| Isoleucine                                     | 1.6           |
| Leucine                                        | 2.5           |
| Lysine                                         | 1.7           |
| Methionine                                     | 0.8           |
| Phenylalanine                                  | 1.2           |
| Proline                                        | 1.1           |
| Serine                                         | 3.4           |
| Threonine                                      | 1.5           |
| Tryptophan                                     | 0.5           |
| Tyrosine                                       | 1.3           |
| Valine                                         | 1.8           |
| Additional minor<br>components are proprietary |               |
