# Supplementary material for: Quantitative characterization of metabolism and metabolic shifts during growth of the new human cell line AGE1.HN using time resolved metabolic flux analysis
Source: PubMed Central journal article supplement — Bioprocess Biosyst Eng. 2010 Dec 25;34(5):533–45. doi: 10.1007/s00449-010-0502-y (PMC3092918; doi:10.1007/s00449-010-0502-y), 2010-12-25
Supplement: 449_2010_502_MOESM5_ESM.pdf [file 449_2010_502_MOESM5_ESM.pdf]

**Table S2.** Time course of metabolic fluxes. Mean values (p.1 and 2) and confidence intervals (90 %, p.3 and 4) of four parallel cultivations.

| Time [h]                    | Mean values (n=4) [μmol/g/h] |       |       |       |       |       |       |       |       |       |       |       |       |       |      |      |      |      |      |      |      |      |      |      |      |      |      |      |      |      |       |       |       |       |       |       |       |       |       |       |       |       |       |       |      |      |       |       |       |       |       |       |       |       |       |       |       |       |       |       |       |       |       |       |       |       |       |       |       |       |       |       |       |       |       |       |       |       |       |       |       |       |        |        |        |        |        |        |        |        |        |        |        |        |        |        |        |        |        |        |        |        |        |        |        |        |        |        |        |        |        |        |        |        |        |        |        |        |        |        |        |        |        |        |        |        |        |        |        |        |        |        |        |        |        |        |        |        |        |        |        |        |        |        |        |        |        |        |        |        |        |        |        |        |        |        |        |        |        |        |        |        |        |        |        |        |        |        |        |        |        |        |        |        |        |        |        |        |        |        |        |        |        |        |        |        |        |        |        |        |        |        |        |        |        |        |        |        |        |        |        |        |        |        |        |        |        |        |        |        |        |        |        |        |        |        |        |        |        |        |        |        |        |        |        |        |        |        |        |        |        |        |        |        |        |        |        |        |        |        |        |        |        |        |        |        |        |        |        |        |        |        |        |        |        |        |        |        |        |        |        |        |        |        |        |        |        |        |        |        |        |        |        |        |        |        |        |        |        |        |        |        |        |        |        |        |        |        |        |        |        |        |        |        |        |        |        |        |        |        |        |        |        |        |        |        |        |        |        |        |        |        |        |        |        |        |        |        |        |        |        |        |        |        |        |        |        |        |        |        |        |        |        |        |        |        |        |        |        |        |        |        |        |        |        |        |        |        |        |        |        |        |        |        |        |        |        |        |        |        |        |        |        |        |        |        |        |        |        |        |        |        |        |        |        |        |        |        |        |        |        |        |        |        |        |        |        |        |        |        |        |        |        |        |        |        |        |        |        |        |        |        |        |        |        |        |        |        |        |        |        |        |        |        |        |        |        |        |        |        |        |        |        |        |        |        |        |        |        |        |        |        |        |        |        |        |        |        |        |        |        |        |         |         |         |         |         |         |         |         |         |         |         |         |         |         |         |         |         |         |         |         |         |         |         |         |         |         |         |         |         |         |         |         |         |         |         |         |         |         |         |         |         |         |         |         |         |         |         |         |         |         |         |         |         |         |         |         |         |         |         |         |         |         |         |         |         |         |         |         |         |         |         |         |         |         |         |         |         |         |         |         |         |         |         |         |         |         |         |         |         |         |         |         |         |         |         |         |         |         |         |         |         |         |         |         |         |         |         |         |         |         |         |         |         |         |         |         |         |         |         |         |         |         |         |         |         |         |         |         |         |         |         |         |         |         |         |         |         |         |         |         |         |         |         |         |         |         |         |         |         |         |         |         |         |         |         |         |         |         |         |         |         |         |         |         |         |         |         |         |         |         |         |         |         |         |         |         |         |         |         |         |         |         |         |         |         |         |         |         |         |         |         |         |         |         |         |         |         |         |         |         |         |         |         |         |         |         |         |         |         |         |         |         |         |         |         |         |         |         |         |         |         |         |         |         |         |         |         |         |         |         |         |         |         |         |         |         |         |         |         |         |         |         |         |         |         |         |         |         |         |         |         |         |         |         |         |         |         |         |         |         |         |         |         |         |         |         |         |         |         |         |         |         |         |         |         |         |         |         |         |         |         |         |         |         |         |         |         |         |         |         |         |         |         |         |         |         |         |         |         |         |         |         |         |         |         |         |         |         |         |         |         |         |         |         |         |         |         |         |         |         |         |         |         |         |         |         |         |         |         |         |         |         |         |         |         |         |         |         |         |         |         |         |         |         |         |         |         |         |         |         |         |         |         |         |         |         |         |         |         |         |         |         |         |         |         |         |         |         |         |         |         |         |         |         |         |         |         |         |         |         |         |         |         |         |         |         |         |         |         |         |         |         |         |         |         |         |         |         |         |         |         |         |         |         |         |         |         |         |         |         |         |         |         |         |         |         |         |         |         |         |         |         |         |         |         |         |         |         |         |         |         |         |         |         |         |         |         |         |         |         |         |         |         |         |         |         |         |         |         |         |         |         |         |         |         |         |         |         |         |         |         |         |         |         |         |         |         |         |         |         |         |         |         |         |         |         |         |         |         |         |         |         |         |         |         |         |         |         |         |         |         |         |         |         |         |         |         |         |         |         |         |         |         |         |         |         |         |         |         |         |         |         |         |         |         |         |         |         |         |         |         |         |         |         |         |         |         |         |         |         |         |         |         |         |         |         |         |         |         |         |         |         |         |         |         |         |         |         |         |         |         |         |         |         |         |         |         |         |         |         |         |         |         |         |         |         |         |         |         |         |         |         |         |         |         |         |         |         |         |         |         |         |         |         |         |         |         |         |         |         |         |         |         |         |         |         |         |         |         |         |         |         |         |         |         |         |         |         |         |         |         |         |         |         |         |         |         |         |         |         |         |         |         |         |         |         |         |         |         |         |         |         |         |         |         |         |         |         |         |         |         |         |         |         |         |         |         |         |         |         |         |         |         |         |         |         |         |         |         |         |         |         |         |         |         |         |         |         |         |         |         |         |         |         |         |         |
|-----------------------------|------------------------------|-------|-------|-------|-------|-------|-------|-------|-------|-------|-------|-------|-------|-------|------|------|------|------|------|------|------|------|------|------|------|------|------|------|------|------|-------|-------|-------|-------|-------|-------|-------|-------|-------|-------|-------|-------|-------|-------|------|------|-------|-------|-------|-------|-------|-------|-------|-------|-------|-------|-------|-------|-------|-------|-------|-------|-------|-------|-------|-------|-------|-------|-------|-------|-------|-------|-------|-------|-------|-------|-------|-------|-------|-------|-------|-------|--------|--------|--------|--------|--------|--------|--------|--------|--------|--------|--------|--------|--------|--------|--------|--------|--------|--------|--------|--------|--------|--------|--------|--------|--------|--------|--------|--------|--------|--------|--------|--------|--------|--------|--------|--------|--------|--------|--------|--------|--------|--------|--------|--------|--------|--------|--------|--------|--------|--------|--------|--------|--------|--------|--------|--------|--------|--------|--------|--------|--------|--------|--------|--------|--------|--------|--------|--------|--------|--------|--------|--------|--------|--------|--------|--------|--------|--------|--------|--------|--------|--------|--------|--------|--------|--------|--------|--------|--------|--------|--------|--------|--------|--------|--------|--------|--------|--------|--------|--------|--------|--------|--------|--------|--------|--------|--------|--------|--------|--------|--------|--------|--------|--------|--------|--------|--------|--------|--------|--------|--------|--------|--------|--------|--------|--------|--------|--------|--------|--------|--------|--------|--------|--------|--------|--------|--------|--------|--------|--------|--------|--------|--------|--------|--------|--------|--------|--------|--------|--------|--------|--------|--------|--------|--------|--------|--------|--------|--------|--------|--------|--------|--------|--------|--------|--------|--------|--------|--------|--------|--------|--------|--------|--------|--------|--------|--------|--------|--------|--------|--------|--------|--------|--------|--------|--------|--------|--------|--------|--------|--------|--------|--------|--------|--------|--------|--------|--------|--------|--------|--------|--------|--------|--------|--------|--------|--------|--------|--------|--------|--------|--------|--------|--------|--------|--------|--------|--------|--------|--------|--------|--------|--------|--------|--------|--------|--------|--------|--------|--------|--------|--------|--------|--------|--------|--------|--------|--------|--------|--------|--------|--------|--------|--------|--------|--------|--------|--------|--------|--------|--------|--------|--------|--------|--------|--------|--------|--------|--------|--------|--------|--------|--------|--------|--------|--------|--------|--------|--------|--------|--------|--------|--------|--------|--------|--------|--------|--------|--------|--------|--------|--------|--------|--------|--------|--------|--------|--------|--------|--------|--------|--------|--------|--------|--------|--------|--------|--------|--------|--------|--------|--------|--------|--------|--------|--------|--------|--------|--------|--------|--------|--------|--------|--------|--------|--------|--------|--------|--------|--------|--------|--------|--------|--------|--------|--------|--------|--------|--------|--------|--------|--------|--------|--------|--------|--------|--------|--------|--------|--------|--------|--------|--------|--------|--------|--------|--------|--------|--------|--------|--------|--------|--------|--------|--------|--------|--------|--------|--------|--------|---------|---------|---------|---------|---------|---------|---------|---------|---------|---------|---------|---------|---------|---------|---------|---------|---------|---------|---------|---------|---------|---------|---------|---------|---------|---------|---------|---------|---------|---------|---------|---------|---------|---------|---------|---------|---------|---------|---------|---------|---------|---------|---------|---------|---------|---------|---------|---------|---------|---------|---------|---------|---------|---------|---------|---------|---------|---------|---------|---------|---------|---------|---------|---------|---------|---------|---------|---------|---------|---------|---------|---------|---------|---------|---------|---------|---------|---------|---------|---------|---------|---------|---------|---------|---------|---------|---------|---------|---------|---------|---------|---------|---------|---------|---------|---------|---------|---------|---------|---------|---------|---------|---------|---------|---------|---------|---------|---------|---------|---------|---------|---------|---------|---------|---------|---------|---------|---------|---------|---------|---------|---------|---------|---------|---------|---------|---------|---------|---------|---------|---------|---------|---------|---------|---------|---------|---------|---------|---------|---------|---------|---------|---------|---------|---------|---------|---------|---------|---------|---------|---------|---------|---------|---------|---------|---------|---------|---------|---------|---------|---------|---------|---------|---------|---------|---------|---------|---------|---------|---------|---------|---------|---------|---------|---------|---------|---------|---------|---------|---------|---------|---------|---------|---------|---------|---------|---------|---------|---------|---------|---------|---------|---------|---------|---------|---------|---------|---------|---------|---------|---------|---------|---------|---------|---------|---------|---------|---------|---------|---------|---------|---------|---------|---------|---------|---------|---------|---------|---------|---------|---------|---------|---------|---------|---------|---------|---------|---------|---------|---------|---------|---------|---------|---------|---------|---------|---------|---------|---------|---------|---------|---------|---------|---------|---------|---------|---------|---------|---------|---------|---------|---------|---------|---------|---------|---------|---------|---------|---------|---------|---------|---------|---------|---------|---------|---------|---------|---------|---------|---------|---------|---------|---------|---------|---------|---------|---------|---------|---------|---------|---------|---------|---------|---------|---------|---------|---------|---------|---------|---------|---------|---------|---------|---------|---------|---------|---------|---------|---------|---------|---------|---------|---------|---------|---------|---------|---------|---------|---------|---------|---------|---------|---------|---------|---------|---------|---------|---------|---------|---------|---------|---------|---------|---------|---------|---------|---------|---------|---------|---------|---------|---------|---------|---------|---------|---------|---------|---------|---------|---------|---------|---------|---------|---------|---------|---------|---------|---------|---------|---------|---------|---------|---------|---------|---------|---------|---------|---------|---------|---------|---------|---------|---------|---------|---------|---------|---------|---------|---------|---------|---------|---------|---------|---------|---------|---------|---------|---------|---------|---------|---------|---------|---------|---------|---------|---------|---------|---------|---------|---------|---------|---------|---------|---------|---------|---------|---------|---------|---------|---------|---------|---------|---------|---------|---------|---------|---------|---------|---------|---------|---------|---------|---------|---------|---------|---------|---------|---------|---------|---------|---------|---------|---------|---------|---------|---------|---------|---------|---------|---------|---------|---------|---------|---------|---------|---------|---------|---------|---------|---------|---------|---------|---------|---------|---------|---------|---------|---------|---------|---------|---------|---------|---------|---------|---------|---------|---------|---------|---------|---------|---------|---------|---------|---------|---------|---------|---------|---------|---------|---------|---------|---------|---------|---------|---------|---------|---------|---------|---------|---------|---------|---------|---------|---------|---------|---------|---------|---------|---------|---------|---------|---------|---------|---------|---------|---------|---------|---------|---------|---------|---------|---------|---------|---------|---------|---------|---------|---------|---------|---------|---------|---------|---------|---------|---------|---------|---------|---------|---------|---------|---------|---------|---------|---------|---------|---------|---------|---------|---------|---------|---------|---------|---------|---------|---------|---------|---------|---------|---------|---------|---------|---------|---------|---------|---------|---------|---------|---------|---------|---------|---------|---------|---------|---------|---------|---------|---------|---------|---------|---------|---------|---------|---------|---------|---------|---------|---------|---------|---------|---------|---------|---------|---------|---------|---------|---------|---------|---------|---------|---------|---------|---------|---------|---------|---------|---------|---------|---------|---------|---------|---------|---------|---------|---------|---------|---------|---------|---------|---------|---------|---------|---------|---------|---------|---------|---------|---------|---------|---------|---------|---------|---------|---------|---------|---------|---------|---------|---------|---------|---------|---------|---------|---------|---------|---------|---------|---------|---------|---------|---------|---------|---------|---------|---------|---------|---------|---------|---------|---------|---------|---------|---------|---------|---------|---------|---------|---------|---------|---------|---------|---------|---------|---------|---------|---------|---------|---------|---------|---------|---------|---------|---------|---------|---------|---------|---------|---------|---------|---------|---------|---------|---------|---------|---------|---------|---------|
|                             | 30.3                         | 32.6  | 34.9  | 37.3  | 39.6  | 41.9  | 44.3  | 46.6  | 48.9  | 51.2  | 53.6  | 55.9  | 58.2  | 60.6  | 62.9 | 65.2 | 67.5 | 69.9 | 72.2 | 74.5 | 76.9 | 79.2 | 81.5 | 83.8 | 86.2 | 88.5 | 90.8 | 93.2 | 95.5 | 97.8 | 100.2 | 102.5 | 104.8 | 107.1 | 109.5 | 111.8 | 114.1 | 116.5 | 118.8 | 121.1 | 123.4 | 125.8 | 128.1 | 130.4 |      |      |       |       |       |       |       |       |       |       |       |       |       |       |       |       |       |       |       |       |       |       |       |       |       |       |       |       |       |       |       |       |       |       |       |       |       |       |        |        |        |        |        |        |        |        |        |        |        |        |        |        |        |        |        |        |        |        |        |        |        |        |        |        |        |        |        |        |        |        |        |        |        |        |        |        |        |        |        |        |        |        |        |        |        |        |        |        |        |        |        |        |        |        |        |        |        |        |        |        |        |        |        |        |        |        |        |        |        |        |        |        |        |        |        |        |        |        |        |        |        |        |        |        |        |        |        |        |        |        |        |        |        |        |        |        |        |        |        |        |        |        |        |        |        |        |        |        |        |        |        |        |        |        |        |        |        |        |        |        |        |        |        |        |        |        |        |        |        |        |        |        |        |        |        |        |        |        |        |        |        |        |        |        |        |        |        |        |        |        |        |        |        |        |        |        |        |        |        |        |        |        |        |        |        |        |        |        |        |        |        |        |        |        |        |        |        |        |        |        |        |        |        |        |        |        |        |        |        |        |        |        |        |        |        |        |        |        |        |        |        |        |        |        |        |        |        |        |        |        |        |        |        |        |        |        |        |        |        |        |        |        |        |        |        |        |        |        |        |        |        |        |        |        |        |        |        |        |        |        |        |        |        |        |        |        |        |        |        |        |        |        |        |        |        |        |        |        |        |        |        |        |        |        |        |        |        |        |        |        |        |        |        |        |        |        |        |        |        |        |        |        |        |        |        |        |        |        |        |        |        |        |        |        |        |        |        |        |        |        |        |        |        |        |        |        |        |        |        |        |        |        |        |        |        |        |        |        |        |        |        |        |        |        |        |        |        |        |        |        |        |        |        |        |        |        |        |        |        |        |        |        |        |        |        |        |        |        |        |        |        |        |        |        |        |        |        |        |         |         |         |         |         |         |         |         |         |         |         |         |         |         |         |         |         |         |         |         |         |         |         |         |         |         |         |         |         |         |         |         |         |         |         |         |         |         |         |         |         |         |         |         |         |         |         |         |         |         |         |         |         |         |         |         |         |         |         |         |         |         |         |         |         |         |         |         |         |         |         |         |         |         |         |         |         |         |         |         |         |         |         |         |         |         |         |         |         |         |         |         |         |         |         |         |         |         |         |         |         |         |         |         |         |         |         |         |         |         |         |         |         |         |         |         |         |         |         |         |         |         |         |         |         |         |         |         |         |         |         |         |         |         |         |         |         |         |         |         |         |         |         |         |         |         |         |         |         |         |         |         |         |         |         |         |         |         |         |         |         |         |         |         |         |         |         |         |         |         |         |         |         |         |         |         |         |         |         |         |         |         |         |         |         |         |         |         |         |         |         |         |         |         |         |         |         |         |         |         |         |         |         |         |         |         |         |         |         |         |         |         |         |         |         |         |         |         |         |         |         |         |         |         |         |         |         |         |         |         |         |         |         |         |         |         |         |         |         |         |         |         |         |         |         |         |         |         |         |         |         |         |         |         |         |         |         |         |         |         |         |         |         |         |         |         |         |         |         |         |         |         |         |         |         |         |         |         |         |         |         |         |         |         |         |         |         |         |         |         |         |         |         |         |         |         |         |         |         |         |         |         |         |         |         |         |         |         |         |         |         |         |         |         |         |         |         |         |         |         |         |         |         |         |         |         |         |         |         |         |         |         |         |         |         |         |         |         |         |         |         |         |         |         |         |         |         |         |         |         |         |         |         |         |         |         |         |         |         |         |         |         |         |         |         |         |         |         |         |         |         |         |         |         |         |         |         |         |         |         |         |         |         |         |         |         |         |         |         |         |         |         |         |         |         |         |         |         |         |         |         |         |         |         |         |         |         |         |         |         |         |         |         |         |         |         |         |         |         |         |         |         |         |         |         |         |         |         |         |         |         |         |         |         |         |         |         |         |         |         |         |         |         |         |         |         |         |         |         |         |         |         |         |         |         |         |         |         |         |         |         |         |         |         |         |         |         |         |         |         |         |         |         |         |         |         |         |         |         |         |         |         |         |         |         |         |         |         |         |         |         |         |         |         |         |         |         |         |         |         |         |         |         |         |         |         |         |         |         |         |         |         |         |         |         |         |         |         |         |         |         |         |         |         |         |         |         |         |         |         |         |         |         |         |         |         |         |         |         |         |         |         |         |         |         |         |         |         |         |         |         |         |         |         |         |         |         |         |         |         |         |         |         |         |         |         |         |         |         |         |         |         |         |         |         |         |         |         |         |         |         |         |         |         |         |         |         |         |         |         |         |         |         |         |         |         |         |         |         |         |         |         |         |         |         |         |         |         |         |         |         |         |         |         |         |         |         |         |         |         |         |         |         |         |         |         |         |         |         |         |         |         |         |         |         |         |         |         |         |         |         |         |         |         |         |         |         |         |         |         |         |         |         |         |         |         |         |         |         |         |         |         |         |         |         |         |         |         |         |         |         |         |         |         |         |         |
| <b>Extracellular fluxes</b> | 221.5                        | 212.2 | 193.7 | 178.6 | 165.5 | 154.3 | 144.9 | 136.9 | 130.2 | 123.9 | 117.7 | 111.6 | 105.5 | 100.0 | 94.5 | 89.1 | 83.8 | 78.7 | 73.8 | 69.3 | 65.1 | 61.1 | 57.3 | 53.6 | 50.1 | 46.8 | 43.5 | 40.3 | 37.2 | 34.2 | 31.3  | 28.4  | 25.5  | 22.7  | 20.0  | 17.4  | 14.8  | 12.3  | 9.7   | 7.1   | 4.5   | 1.9   | -0.7  | -3.2  | -5.7 | -8.2 | -10.7 | -13.2 | -15.7 | -18.2 | -20.7 | -23.2 | -25.7 | -28.2 | -30.7 | -33.2 | -35.7 | -38.2 | -40.7 | -43.2 | -45.7 | -48.2 | -50.7 | -53.2 | -55.7 | -58.2 | -60.7 | -63.2 | -65.7 | -68.2 | -70.7 | -73.2 | -75.7 | -78.2 | -80.7 | -83.2 | -85.7 | -88.2 | -90.7 | -93.2 | -95.7 | -98.2 | -100.7 | -103.2 | -105.7 | -108.2 | -110.7 | -113.2 | -115.7 | -118.2 | -120.7 | -123.2 | -125.7 | -128.2 | -130.7 | -133.2 | -135.7 | -138.2 | -140.7 | -143.2 | -145.7 | -148.2 | -150.7 | -153.2 | -155.7 | -158.2 | -160.7 | -163.2 | -165.7 | -168.2 | -170.7 | -173.2 | -175.7 | -178.2 | -180.7 | -183.2 | -185.7 | -188.2 | -190.7 | -193.2 | -195.7 | -198.2 | -200.7 | -203.2 | -205.7 | -208.2 | -210.7 | -213.2 | -215.7 | -218.2 | -220.7 | -223.2 | -225.7 | -228.2 | -230.7 | -233.2 | -235.7 | -238.2 | -240.7 | -243.2 | -245.7 | -248.2 | -250.7 | -253.2 | -255.7 | -258.2 | -260.7 | -263.2 | -265.7 | -268.2 | -270.7 | -273.2 | -275.7 | -278.2 | -280.7 | -283.2 | -285.7 | -288.2 | -290.7 | -293.2 | -295.7 | -298.2 | -300.7 | -303.2 | -305.7 | -308.2 | -310.7 | -313.2 | -315.7 | -318.2 | -320.7 | -323.2 | -325.7 | -328.2 | -330.7 | -333.2 | -335.7 | -338.2 | -340.7 | -343.2 | -345.7 | -348.2 | -350.7 | -353.2 | -355.7 | -358.2 | -360.7 | -363.2 | -365.7 | -368.2 | -370.7 | -373.2 | -375.7 | -378.2 | -380.7 | -383.2 | -385.7 | -388.2 | -390.7 | -393.2 | -395.7 | -398.2 | -400.7 | -403.2 | -405.7 | -408.2 | -410.7 | -413.2 | -415.7 | -418.2 | -420.7 | -423.2 | -425.7 | -428.2 | -430.7 | -433.2 | -435.7 | -438.2 | -440.7 | -443.2 | -445.7 | -448.2 | -450.7 | -453.2 | -455.7 | -458.2 | -460.7 | -463.2 | -465.7 | -468.2 | -470.7 | -473.2 | -475.7 | -478.2 | -480.7 | -483.2 | -485.7 | -488.2 | -490.7 | -493.2 | -495.7 | -498.2 | -500.7 | -503.2 | -505.7 | -508.2 | -510.7 | -513.2 | -515.7 | -518.2 | -520.7 | -523.2 | -525.7 | -528.2 | -530.7 | -533.2 | -535.7 | -538.2 | -540.7 | -543.2 | -545.7 | -548.2 | -550.7 | -553.2 | -555.7 | -558.2 | -560.7 | -563.2 | -565.7 | -568.2 | -570.7 | -573.2 | -575.7 | -578.2 | -580.7 | -583.2 | -585.7 | -588.2 | -590.7 | -593.2 | -595.7 | -598.2 | -600.7 | -603.2 | -605.7 | -608.2 | -610.7 | -613.2 | -615.7 | -618.2 | -620.7 | -623.2 | -625.7 | -628.2 | -630.7 | -633.2 | -635.7 | -638.2 | -640.7 | -643.2 | -645.7 | -648.2 | -650.7 | -653.2 | -655.7 | -658.2 | -660.7 | -663.2 | -665.7 | -668.2 | -670.7 | -673.2 | -675.7 | -678.2 | -680.7 | -683.2 | -685.7 | -688.2 | -690.7 | -693.2 | -695.7 | -698.2 | -700.7 | -703.2 | -705.7 | -708.2 | -710.7 | -713.2 | -715.7 | -718.2 | -720.7 | -723.2 | -725.7 | -728.2 | -730.7 | -733.2 | -735.7 | -738.2 | -740.7 | -743.2 | -745.7 | -748.2 | -750.7 | -753.2 | -755.7 | -758.2 | -760.7 | -763.2 | -765.7 | -768.2 | -770.7 | -773.2 | -775.7 | -778.2 | -780.7 | -783.2 | -785.7 | -788.2 | -790.7 | -793.2 | -795.7 | -798.2 | -800.7 | -803.2 | -805.7 | -808.2 | -810.7 | -813.2 | -815.7 | -818.2 | -820.7 | -823.2 | -825.7 | -828.2 | -830.7 | -833.2 | -835.7 | -838.2 | -840.7 | -843.2 | -845.7 | -848.2 | -850.7 | -853.2 | -855.7 | -858.2 | -860.7 | -863.2 | -865.7 | -868.2 | -870.7 | -873.2 | -875.7 | -878.2 | -880.7 | -883.2 | -885.7 | -888.2 | -890.7 | -893.2 | -895.7 | -898.2 | -900.7 | -903.2 | -905.7 | -908.2 | -910.7 | -913.2 | -915.7 | -918.2 | -920.7 | -923.2 | -925.7 | -928.2 | -930.7 | -933.2 | -935.7 | -938.2 | -940.7 | -943.2 | -945.7 | -948.2 | -950.7 | -953.2 | -955.7 | -958.2 | -960.7 | -963.2 | -965.7 | -968.2 | -970.7 | -973.2 | -975.7 | -978.2 | -980.7 | -983.2 | -985.7 | -988.2 | -990.7 | -993.2 | -995.7 | -998.2 | -1000.7 | -1003.2 | -1005.7 | -1008.2 | -1010.7 | -1013.2 | -1015.7 | -1018.2 | -1020.7 | -1023.2 | -1025.7 | -1028.2 | -1030.7 | -1033.2 | -1035.7 | -1038.2 | -1040.7 | -1043.2 | -1045.7 | -1048.2 | -1050.7 | -1053.2 | -1055.7 | -1058.2 | -1060.7 | -1063.2 | -1065.7 | -1068.2 | -1070.7 | -1073.2 | -1075.7 | -1078.2 | -1080.7 | -1083.2 | -1085.7 | -1088.2 | -1090.7 | -1093.2 | -1095.7 | -1098.2 | -1100.7 | -1103.2 | -1105.7 | -1108.2 | -1110.7 | -1113.2 | -1115.7 | -1118.2 | -1120.7 | -1123.2 | -1125.7 | -1128.2 | -1130.7 | -1133.2 | -1135.7 | -1138.2 | -1140.7 | -1143.2 | -1145.7 | -1148.2 | -1150.7 | -1153.2 | -1155.7 | -1158.2 | -1160.7 | -1163.2 | -1165.7 | -1168.2 | -1170.7 | -1173.2 | -1175.7 | -1178.2 | -1180.7 | -1183.2 | -1185.7 | -1188.2 | -1190.7 | -1193.2 | -1195.7 | -1198.2 | -1200.7 | -1203.2 | -1205.7 | -1208.2 | -1210.7 | -1213.2 | -1215.7 | -1218.2 | -1220.7 | -1223.2 | -1225.7 | -1228.2 | -1230.7 | -1233.2 | -1235.7 | -1238.2 | -1240.7 | -1243.2 | -1245.7 | -1248.2 | -1250.7 | -1253.2 | -1255.7 | -1258.2 | -1260.7 | -1263.2 | -1265.7 | -1268.2 | -1270.7 | -1273.2 | -1275.7 | -1278.2 | -1280.7 | -1283.2 | -1285.7 | -1288.2 | -1290.7 | -1293.2 | -1295.7 | -1298.2 | -1300.7 | -1303.2 | -1305.7 | -1308.2 | -1310.7 | -1313.2 | -1315.7 | -1318.2 | -1320.7 | -1323.2 | -1325.7 | -1328.2 | -1330.7 | -1333.2 | -1335.7 | -1338.2 | -1340.7 | -1343.2 | -1345.7 | -1348.2 | -1350.7 | -1353.2 | -1355.7 | -1358.2 | -1360.7 | -1363.2 | -1365.7 | -1368.2 | -1370.7 | -1373.2 | -1375.7 | -1378.2 | -1380.7 | -1383.2 | -1385.7 | -1388.2 | -1390.7 | -1393.2 | -1395.7 | -1398.2 | -1400.7 | -1403.2 | -1405.7 | -1408.2 | -1410.7 | -1413.2 | -1415.7 | -1418.2 | -1420.7 | -1423.2 | -1425.7 | -1428.2 | -1430.7 | -1433.2 | -1435.7 | -1438.2 | -1440.7 | -1443.2 | -1445.7 | -1448.2 | -1450.7 | -1453.2 | -1455.7 | -1458.2 | -1460.7 | -1463.2 | -1465.7 | -1468.2 | -1470.7 | -1473.2 | -1475.7 | -1478.2 | -1480.7 | -1483.2 | -1485.7 | -1488.2 | -1490.7 | -1493.2 | -1495.7 | -1498.2 | -1500.7 | -1503.2 | -1505.7 | -1508.2 | -1510.7 | -1513.2 | -1515.7 | -1518.2 | -1520.7 | -1523.2 | -1525.7 | -1528.2 | -1530.7 | -1533.2 | -1535.7 | -1538.2 | -1540.7 | -1543.2 | -1545.7 | -1548.2 | -1550.7 | -1553.2 | -1555.7 | -1558.2 | -1560.7 | -1563.2 | -1565.7 | -1568.2 | -1570.7 | -1573.2 | -1575.7 | -1578.2 | -1580.7 | -1583.2 | -1585.7 | -1588.2 | -1590.7 | -1593.2 | -1595.7 | -1598.2 | -1600.7 | -1603.2 | -1605.7 | -1608.2 | -1610.7 | -1613.2 | -1615.7 | -1618.2 | -1620.7 | -1623.2 | -1625.7 | -1628.2 | -1630.7 | -1633.2 | -1635.7 | -1638.2 | -1640.7 | -1643.2 | -1645.7 | -1648.2 | -1650.7 | -1653.2 | -1655.7 | -1658.2 | -1660.7 | -1663.2 | -1665.7 | -1668.2 | -1670.7 | -1673.2 | -1675.7 | -1678.2 | -1680.7 | -1683.2 | -1685.7 | -1688.2 | -1690.7 | -1693.2 | -1695.7 | -1698.2 | -1700.7 | -1703.2 | -1705.7 | -1708.2 | -1710.7 | -1713.2 | -1715.7 | -1718.2 | -1720.7 | -1723.2 | -1725.7 | -1728.2 | -1730.7 | -1733.2 | -1735.7 | -1738.2 | -1740.7 | -1743.2 | -1745.7 | -1748.2 | -1750.7 | -1753.2 | -1755.7 | -1758.2 | -1760.7 | -1763.2 | -1765.7 | -1768.2 | -1770.7 | -1773.2 | -1775.7 | -1778.2 | -1780.7 | -1783.2 | -1785.7 | -1788.2 | -1790.7 | -1793.2 | -1795.7 | -1798.2 | -1800.7 | -1803.2 | -1805.7 | -1808.2 | -1810.7 | -1813.2 | -1815.7 | -1818.2 | -1820.7 | -1823.2 | -1825.7 | -1828.2 | -1830.7 | -1833.2 | -1835.7 | -1838.2 | -1840.7 | -1843.2 | -1845.7 | -1848.2 | -1850.7 | -1853.2 | -1855.7 | -1858.2 | -1860.7 | -1863.2 | -1865.7 | -1868.2 | -1870.7 | -1873.2 | -1875.7 | -1878.2 | -1880.7 | -1883.2 | -1885.7 | -1888.2 | -1890.7 | -1893.2 | -1895.7 | -1898.2 | -1900.7 | -1903.2 | -1905.7 | -1908.2 | -1910.7 | -1913.2 | -1915.7 | -1918.2 | -1920.7 | -1923.2 | -1925.7 | -1928.2 | -1930.7 | -1933.2 | -1935.7 | -1938.2 | -1940.7 | -1943.2 | -1945.7 | -1948.2 | -1950.7 | -1953.2 | -1955.7 | -1958.2 | -1960.7 | -1963.2 | -1965.7 | -1968.2 | -1970.7 | -1973.2 | -1975.7 | -1978.2 | -1980.7 | -1983.2 | -1985.7 | -1988.2 | -1990.7 | -1993.2 | -1995.7 | -1998.2 | -2000.7 | -2003.2 | -2005.7 | -2008.2 | -2010.7 | -2013.2 | -2015.7 | -2018.2 | -2020.7 | -2023.2 | -2025.7 | -2028.2 | -2030.7 | -2033.2 | -2035.7 | -2038.2 | -2040.7 | -2043.2 | -2045.7 | -2048.2 | -2050.7 | -2053.2 | -2055.7 | -2058.2 | -2060.7 | -2063.2 | -2065.7 | -2068.2 | -2070.7 | -2073.2 | -2075.7 | -2078.2 | -2080.7 | -2083.2 | -2085.7 | -2088.2 | -2090.7 | -2093.2 | -2095.7 | -2098.2 | -2100.7 | -2103.2 | -2105.7 | -2108.2 | -2110.7 | -2113.2 | -2115.7 | -2118.2 | -2120.7 | -2123.2 | -2125.7 | -2128.2 | -2130.7 | -2133.2 | -2135.7 | -2138.2 | -2140.7 | -2143.2 | -2145.7 | -2148.2 | -2150.7 | -2153.2 | -2155.7 | -2158.2 | -2160.7 | -2163.2 | -2165.7 | -2168.2 | -2170.7 | -2173.2 | -2175.7 | -2178.2 | -2180.7 | -2183.2 | -2185.7 | -2188.2 | -2190.7 | -2193.2 | -2195.7 | -2198.2 | -2200.7 | -2203.2 | -2205.7 | -2208.2 | -2210.7 | -2213.2 | -2215.7 | -2218.2 | -2220.7 | -2223.2 | -2225.7 | -2228.2 | -2230.7 | -2233.2 | -2235.7 | -2238.2 | -2240.7 | -2243.2 | -2245.7 | -2248.2 | -2250.7 | -2253.2 | -2255.7 | -2258.2 | -2260.7 | -2263.2 | -2265.7 | -2268.2 | -2270.7 | -2273.2 | -2275.7 | -2278.2 | -2280.7 | -2283.2 | -2285.7 | -2288.2 | -2290.7 | -2293.2 | -2295.7 | -2298.2 | -2300.7 | -2303.2 | -2305.7 | -2308.2 | -2310.7 | -2313.2 | -2315.7 | -2318.2 | -2320.7 | -2323.2 | -2325.7 | -2328.2 | -2330.7 | -2333.2 | -2335.7 | -2338.2 | -2340.7 | -2343.2 | -2345.7 | -2348.2 | -2350.7 | -2353.2 | -2355.7 | -2358.2 | -2360.7 | -2363.2 | -2365.7 | -2368.2 | -2370.7 | -2373.2 | -2375.7 | -2378.2 | -2380.7 | -2383.2 | -2385.7 | -2388.2 | -2390.7 | -2393.2 | -2395.7 | -2398.2 | -2400.7 | -2403.2 | -2405.7 | -2408.2 | -2410.7 | -2413.2 | -2415.7 | -2418.2 | -2420.7 | -2423.2 | -2425.7 | -2428.2 | -2430.7 | -2433.2 | -2435.7 | -2438.2 | -2440.7 | -2443.2 | -2445.7 | -2448.2 | -2450.7 | -2453.2 | -2455.7 | -2458.2 | -2460.7 | -2463.2 | -2465.7 | -2468.2 | -2470.7 | -2473.2 | -2475.7 | -2478.2 | -2480.7 | -2483.2 | -2485.7 | -2488.2 | -2490.7 | -2493.2 | -2495.7 | -2498.2 | -2500.7 | -2503.2 | -2505.7 | -2508.2 | -2510.7 | -2513.2 | -2515.7 | -2518.2 | -2520.7 | -2523.2 | -2525.7 | -2528.2 | -2530.7 | -2533.2 | -2535.7 | -2538.2 | -2540.7 | -2543.2 | -2545.7 | -2548.2 | -2550.7 | -2553.2 | -2555.7 | -2558.2 | -2560.7 | -2563.2 | -2565.7 | -2568.2 | -2570.7 | -2573.2 | -2575.7 | -2578.2 | -2580.7 | -2583.2 | -2585.7 | -2588.2 | -2590.7 | -2593.2 | -2595.7 | -2598.2 | -2600.7 | -2603.2 | -2605.7 | -2608.2 | -2610.7 | -2613.2 | -2615.7 | -2618.2 | -2620.7 | -2623.2 | -2625.7 | -2628.2 | -2630.7 | -2633.2 | -2635.7 | -2638.2 | -2640.7 | -2643.2 | -2645.7 | -2648.2 | -2650.7 | -2653.2 | -2655.7 | -2658.2 | -2660.7 | -2663.2 | -2665.7 | -2668.2 | -2670.7 | -2673.2 | -2675.7 | -2678.2 | -2680.7 | -2683.2 | -2685.7 | -2688.2 |
