# Supplementary material for: Quantitative characterization of metabolism and metabolic shifts during growth of the new human cell line AGE1.HN using time resolved metabolic flux analysis
Source: PubMed Central journal article supplement — Bioprocess Biosyst Eng. 2010 Dec 25;34(5):533–45. doi: 10.1007/s00449-010-0502-y (PMC3092918; doi:10.1007/s00449-010-0502-y), 2010-12-25
Supplement: 449_2010_502_MOESM6_ESM.pdf [file 449_2010_502_MOESM6_ESM.pdf]

**Table S3.** Average metabolic flux distribution of AGE1.HN in each metabolic phase. Mean values and confidence intervals (90 %, CI) of four parallel cultivations. The probabilities of a paired t-test between the different phases are also depicted. The null hypothesis (no difference) was rejected at the 5 % significance level. P1/P2, phase 1 compared with phase 2; P1/P3, phase 1 compared with phase 3; P2/P3, phase 2 compared with phase 3. Network model and abbreviations are shown in Fig. 1.

|                                        | Phase 1 (18-90 h)            |       | Phase 2 (90-160 h)           |       | Phase 3 (160-230 h)          |       | t-test |       |       |
|----------------------------------------|------------------------------|-------|------------------------------|-------|------------------------------|-------|--------|-------|-------|
|                                        | Flux [ $\mu\text{mol/g/h}$ ] | CI    | Flux [ $\mu\text{mol/g/h}$ ] | CI    | Flux [ $\mu\text{mol/g/h}$ ] | CI    | P1/P2  | P1/P3 | P2/P3 |
| <i>Extracellular fluxes</i>            |                              |       |                              |       |                              |       |        |       |       |
| Glc                                    | 123.0                        | 17.3  | 56.6                         | 9.1   | 33.7                         | 10.6  | 0.00   | 0.00  | 0.04  |
| Lac                                    | -236.3                       | 18.0  | -4.5                         | 4.3   | -14.3                        | 6.0   | 0.00   | 0.00  | 0.20  |
| Pyr                                    | 28.7                         | 1.9   | 0.9                          | 0.3   | 0.4                          | 0.1   | 0.00   | 0.00  | 0.12  |
| Ala                                    | -17.5                        | 1.0   | -8.4                         | 0.5   | 2.2                          | 1.2   | 0.00   | 0.00  | 0.00  |
| Arg                                    | 8.2                          | 0.7   | 6.6                          | 0.3   | 1.9                          | 0.7   | 0.05   | 0.00  | 0.00  |
| Asn                                    | 2.9                          | 0.5   | 2.5                          | 0.2   | 0.8                          | 0.3   | 0.42   | 0.02  | 0.00  |
| Asp                                    | 14.1                         | 4.5   | 9.9                          | 0.4   | 1.8                          | 0.6   | 0.25   | 0.02  | 0.00  |
| Cys                                    | -0.2                         | 0.0   | 0.5                          | 0.0   | -0.1                         | 0.0   | 0.00   | 0.01  | 0.00  |
| Glu                                    | -4.0                         | 0.7   | 2.4                          | 0.3   | 2.9                          | 0.9   | 0.00   | 0.00  | 0.51  |
| Gln                                    | 37.1                         | 2.3   | 23.5                         | 1.5   | 2.1                          | 0.9   | 0.01   | 0.00  | 0.00  |
| Gly                                    | -2.6                         | 1.7   | 1.0                          | 0.4   | 0.5                          | 0.5   | 0.05   | 0.04  | 0.24  |
| His                                    | 1.7                          | 0.2   | 1.5                          | 0.2   | 0.4                          | 0.2   | 0.21   | 0.01  | 0.01  |
| Ile                                    | 8.1                          | 1.4   | 3.9                          | 0.3   | 1.2                          | 0.5   | 0.03   | 0.01  | 0.00  |
| Leu                                    | 11.5                         | 0.7   | 7.1                          | 0.4   | 2.0                          | 0.8   | 0.01   | 0.00  | 0.00  |
| Lys                                    | 6.9                          | 0.8   | 5.7                          | 0.3   | 1.5                          | 0.6   | 0.06   | 0.00  | 0.00  |
| Met                                    | 3.1                          | 0.2   | 2.3                          | 0.2   | 0.7                          | 0.3   | 0.01   | 0.00  | 0.00  |
| Phe                                    | 3.3                          | 0.4   | 2.3                          | 0.3   | 0.6                          | 0.3   | 0.08   | 0.00  | 0.01  |
| Pro                                    | -7.1                         | 1.6   | -7.6                         | 0.4   | -2.4                         | 0.6   | 0.62   | 0.02  | 0.00  |
| Ser                                    | 12.2                         | 0.8   | 9.1                          | 0.7   | 2.3                          | 0.8   | 0.04   | 0.00  | 0.00  |
| Thr                                    | 4.9                          | 1.5   | 3.1                          | 0.3   | 0.7                          | 0.4   | 0.20   | 0.03  | 0.00  |
| Trp                                    | 0.9                          | 0.1   | 0.7                          | 0.1   | 0.3                          | 0.1   | 0.11   | 0.00  | 0.04  |
| Tyr                                    | 2.8                          | 0.7   | 2.3                          | 0.9   | 0.7                          | 0.3   | 0.62   | 0.04  | 0.03  |
| Val                                    | 8.4                          | 1.8   | 4.5                          | 0.4   | 1.4                          | 0.6   | 0.05   | 0.01  | 0.00  |
| <i>Anabolic fluxes</i>                 |                              |       |                              |       |                              |       |        |       |       |
| Car                                    | 6.4                          | 0.8   | 5.1                          | 0.3   | 0.9                          | 0.2   | 0.13   | 0.00  | 0.00  |
| DNA                                    | 0.7                          | 0.1   | 0.5                          | 0.0   | 0.1                          | 0.0   | 0.13   | 0.00  | 0.00  |
| RNA                                    | 2.6                          | 0.3   | 2.1                          | 0.1   | 0.4                          | 0.1   | 0.13   | 0.00  | 0.00  |
| Lip                                    | 1.9                          | 0.2   | 1.5                          | 0.1   | 0.3                          | 0.1   | 0.13   | 0.00  | 0.00  |
| Pro                                    | 94.0                         | 12.2  | 74.9                         | 4.7   | 13.7                         | 3.6   | 0.13   | 0.00  | 0.00  |
| <i>Intracellular fluxes</i>            |                              |       |                              |       |                              |       |        |       |       |
| G6P-F6P                                | 113.3                        | 17.7  | 48.9                         | 8.6   | 32.3                         | 10.3  | 0.00   | 0.00  | 0.08  |
| F6P-GAP                                | 113.3                        | 17.7  | 48.9                         | 8.6   | 32.3                         | 10.3  | 0.00   | 0.00  | 0.08  |
| GAP-Pyr                                | 225.2                        | 35.4  | 96.6                         | 17.2  | 64.3                         | 20.5  | 0.00   | 0.01  | 0.09  |
| Pyr-Pyr <sub>m</sub>                   | -16.9                        | 30.4  | 74.2                         | 19.2  | 51.8                         | 16.2  | 0.01   | 0.05  | 0.19  |
| Pyrm-AcC <sub>m</sub>                  | 12.2                         | 35.6  | 88.1                         | 18.2  | 56.8                         | 19.4  | 0.01   | 0.19  | 0.14  |
| OAA/AcC <sub>m</sub> -Cit <sub>m</sub> | 29.4                         | 38.8  | 93.0                         | 17.9  | 62.5                         | 23.3  | 0.02   | 0.36  | 0.19  |
| Cit <sub>m</sub> -AKG <sub>m</sub>     | -4.0                         | 41.8  | 66.4                         | 16.2  | 57.7                         | 22.5  | 0.02   | 0.15  | 0.65  |
| AKG <sub>m</sub> -SuC <sub>m</sub>     | 9.2                          | 42.1  | 74.7                         | 16.3  | 59.3                         | 24.2  | 0.03   | 0.23  | 0.48  |
| SuC <sub>m</sub> -Fum <sub>m</sub>     | 17.5                         | 44.3  | 75.7                         | 15.8  | 60.9                         | 25.6  | 0.05   | 0.31  | 0.51  |
| Fum <sub>m</sub> -Mal <sub>m</sub>     | 18.4                         | 45.0  | 76.3                         | 16.5  | 61.5                         | 26.0  | 0.05   | 0.32  | 0.51  |
| Mal <sub>m</sub> -OAA <sub>m</sub>     | 22.7                         | 36.5  | 88.9                         | 18.5  | 61.4                         | 22.6  | 0.01   | 0.27  | 0.22  |
| Mal <sub>m</sub> -Pyr <sub>m</sub>     | 29.1                         | 9.9   | 14.0                         | 2.6   | 5.0                          | 4.9   | 0.13   | 0.06  | 0.06  |
| Cit <sub>m</sub> -Cit                  | 33.4                         | 4.3   | 26.6                         | 1.7   | 4.8                          | 1.3   | 0.13   | 0.00  | 0.00  |
| Cit-AcC/Mal                            | 33.4                         | 4.3   | 26.6                         | 1.7   | 4.8                          | 1.3   | 0.13   | 0.00  | 0.00  |
| Mal-Mal <sub>m</sub>                   | 33.4                         | 4.3   | 26.6                         | 1.7   | 4.8                          | 1.3   | 0.13   | 0.00  | 0.00  |
| G6P-P5P                                | 3.3                          | 0.4   | 2.6                          | 0.2   | 0.5                          | 0.1   | 0.13   | 0.00  | 0.00  |
| NADH-OP                                | 48.1                         | 198.4 | 395.0                        | 82.9  | 288.8                        | 111.5 | 0.02   | 0.21  | 0.32  |
| FADH <sub>2</sub> -OP                  | 28.3                         | 46.0  | 77.5                         | 15.3  | 63.1                         | 27.2  | 0.08   | 0.42  | 0.54  |
| ATP <sub>OP</sub>                      | 162.8                        | 565.0 | 1103.7                       | 229.9 | 816.8                        | 319.2 | 0.02   | 0.23  | 0.34  |

|                                        |        |       |        |       |       |       |      |      |      |
|----------------------------------------|--------|-------|--------|-------|-------|-------|------|------|------|
| ATP <sub>wOP</sub>                     | -102.3 | 110.9 | -111.6 | 16.1  | 71.3  | 33.2  | 0.89 | 0.11 | 0.01 |
| ATP <sub>exc</sub>                     | 60.5   | 674.4 | 992.1  | 244.7 | 888.1 | 352.3 | 0.04 | 0.21 | 0.73 |
| Ala-Pyr                                | -24.2  | 1.6   | -13.8  | 0.5   | 1.4   | 1.2   | 0.00 | 0.00 | 0.00 |
| Arg-Glu                                | 3.3    | 1.0   | 2.7    | 0.3   | 1.2   | 0.6   | 0.36 | 0.05 | 0.01 |
| Asn-Asp                                | -1.5   | 0.4   | -1.0   | 0.2   | 0.2   | 0.3   | 0.26 | 0.02 | 0.00 |
| Asp-OAA <sub>m</sub>                   | 6.7    | 4.5   | 4.1    | 0.8   | 1.1   | 0.8   | 0.48 | 0.16 | 0.01 |
| Cys-Pyr                                | -1.3   | 0.7   | -0.7   | 0.2   | 0.0   | 0.2   | 0.18 | 0.06 | 0.00 |
| Gln-Glu                                | 31.1   | 1.7   | 18.7   | 1.3   | 1.2   | 0.9   | 0.00 | 0.00 | 0.00 |
| Glu-AKG <sub>m</sub>                   | 13.2   | 1.2   | 8.3    | 1.3   | 1.7   | 2.2   | 0.03 | 0.01 | 0.03 |
| Gly-Ser                                | -13.2  | 2.4   | -7.4   | 0.3   | -1.1  | 0.6   | 0.03 | 0.00 | 0.00 |
| His-Glu                                | -0.4   | 0.4   | -0.2   | 0.1   | 0.1   | 0.2   | 0.52 | 0.24 | 0.08 |
| Ile-AcC <sub>m</sub> /SuC <sub>m</sub> | 3.9    | 1.1   | 0.6    | 0.3   | 0.6   | 0.5   | 0.03 | 0.03 | 0.99 |
| Leu-AcC <sub>m</sub>                   | 3.3    | 0.4   | 0.6    | 0.4   | 0.8   | 0.7   | 0.01 | 0.02 | 0.58 |
| Lys-AcC <sub>m</sub>                   | -0.2   | 1.4   | 0.0    | 0.4   | 0.5   | 0.5   | 0.78 | 0.50 | 0.22 |
| Met/Ser-SuC <sub>m</sub> /Cys          | 1.5    | 0.4   | 1.0    | 0.1   | 0.5   | 0.2   | 0.04 | 0.02 | 0.02 |
| Phe-Tyr                                | -0.1   | 0.3   | -0.4   | 0.2   | 0.2   | 0.3   | 0.34 | 0.57 | 0.07 |
| Pro-Glu                                | -10.9  | 1.1   | -10.6  | 0.6   | -3.0  | 0.8   | 0.69 | 0.00 | 0.00 |
| Ser-Pyr                                | -9.1   | 2.1   | -4.5   | 0.7   | -0.1  | 0.9   | 0.03 | 0.01 | 0.00 |
| Thr-SuC <sub>m</sub>                   | 0.3    | 1.4   | -0.6   | 0.3   | 0.0   | 0.4   | 0.47 | 0.80 | 0.09 |
| Trp-AcC <sub>m</sub> /Ala              | 0.9    | 0.1   | 0.7    | 0.1   | 0.3   | 0.1   | 0.11 | 0.00 | 0.04 |
| Tyr-AcC <sub>m</sub> /Fum <sub>m</sub> | 0.9    | 0.9   | 0.6    | 0.9   | 0.6   | 0.5   | 0.67 | 0.76 | 0.90 |
| Val-SuC <sub>m</sub>                   | 2.7    | 1.4   | 0.0    | 0.4   | 0.6   | 0.5   | 0.09 | 0.14 | 0.16 |
