# Supplementary material for: Quantitative characterization of metabolism and metabolic shifts during growth of the new human cell line AGE1.HN using time resolved metabolic flux analysis
Source: PubMed Central journal article supplement — Bioprocess Biosyst Eng. 2010 Dec 25;34(5):533–45. doi: 10.1007/s00449-010-0502-y (PMC3092918; doi:10.1007/s00449-010-0502-y), 2010-12-25
Supplement: 449_2010_502_MOESM7_ESM.pdf [file 449_2010_502_MOESM7_ESM.pdf]

**Table S4.** Enzymes considered in the metabolic network.

| Pathway                                | Enzyme                                                                                         |
|----------------------------------------|------------------------------------------------------------------------------------------------|
| Glycolysis                             | hexokinase [EC:2.7.1.1 2.7.1.2]                                                                |
|                                        | glucose-6-phosphate isomerase [EC:5.3.1.9]                                                     |
|                                        | 6-phosphofructokinase [EC:2.7.1.11]                                                            |
|                                        | fructose-1,6-bisphosphatase I [EC:3.1.3.11]                                                    |
|                                        | fructose-bisphosphate aldolase, class I [EC:4.1.2.13]                                          |
|                                        | triosephosphate isomerase (TIM) [EC:5.3.1.1]                                                   |
|                                        | glyceraldehyde 3-phosphate dehydrogenase [EC:1.2.1.12]                                         |
|                                        | phosphoglycerate kinase [EC:2.7.2.3]                                                           |
|                                        | phosphoglycerate mutase [EC:5.4.2.1]                                                           |
|                                        | enolase [EC:4.2.1.11]                                                                          |
|                                        | pyruvate kinase [EC:2.7.1.40]                                                                  |
| Galactose metabolism                   | L-lactate dehydrogenase [EC:1.1.1.27]                                                          |
|                                        | galactokinase [EC:2.7.1.6]                                                                     |
|                                        | UDPglucose--hexose-1-phosphate uridylyltransferase [EC:2.7.7.12]                               |
|                                        | phosphoglucomutase [EC:5.4.2.2]                                                                |
| Oxidative decarboxylation              | UDP-glucose 4-epimerase [EC:5.1.3.2]                                                           |
|                                        | pyruvate dehydrogenase E1 component subunit alpha [EC:1.2.4.1]                                 |
|                                        | pyruvate dehydrogenase E2 component (dihydrolipoamideacetyltransferase) [EC:2.3.1.12]          |
| Pentose phosphate pathway              | dihydrolipoamide dehydrogenase [EC:1.8.1.4]                                                    |
|                                        | glucose-6-phosphate 1-dehydrogenase [EC:1.1.1.49]                                              |
|                                        | 6-phosphogluconolactonase [EC:3.1.1.31]                                                        |
|                                        | 6-phosphogluconate dehydrogenase [EC:1.1.1.44]                                                 |
|                                        | ribose 5-phosphate isomerase A [EC:5.3.1.6]                                                    |
| Other cytosolic reactions              | ribulose-phosphate 3-epimerase [EC:5.1.3.1]                                                    |
|                                        | ATP citrate (pro-S)-lyase [EC:2.3.3.8]                                                         |
| TCA cycle                              | malate dehydrogenase [EC:1.1.1.37]                                                             |
|                                        | citrate synthase [EC:2.3.3.1]                                                                  |
|                                        | aconitate hydratase 1 [EC:4.2.1.3]                                                             |
|                                        | isocitrate dehydrogenase [EC:1.1.1.41/42]                                                      |
|                                        | 2-oxoglutarate dehydrogenase E1 component [EC:1.2.4.2]                                         |
|                                        | 2-oxoglutarate dehydrogenase E2 component (dihydrolipoamide succinyltransferase) [EC:2.3.1.61] |
|                                        | dihydrolipoamide dehydrogenase [EC:1.8.1.4]                                                    |
|                                        | succinyl-CoA synthetase beta subunit [EC:6.2.1.4 6.2.1.5]                                      |
|                                        | succinate dehydrogenase (ubiquinone) flavoprotein subunit [EC:1.3.5.1]                         |
|                                        | fumarate hydratase, class II [EC:4.2.1.2]                                                      |
|                                        | malate dehydrogenase [EC:1.1.1.37]                                                             |
| Pyruvate metabolism                    | phosphoenolpyruvate carboxykinase (GTP) [EC:4.1.1.32]                                          |
|                                        | malate dehydrogenase (oxaloacetate-decarboxylating) [EC:1.1.1.38]                              |
|                                        | malate dehydrogenase (oxaloacetate-decarboxylating)(NADP+) [EC:1.1.1.40]                       |
|                                        | pyruvate carboxylase subunit A [EC:6.4.1.1]                                                    |
| Oxidative phosphorylation              | NADH dehydrogenase (ubiquinone) Fe-S protein 7 [EC:1.6.5.3 1.6.99.3]                           |
|                                        | succinate dehydrogenase (ubiquinone) flavoprotein subunit [EC:1.3.5.1]                         |
|                                        | ubiquinol-cytochrome c reductase iron-sulfur subunit [EC:1.10.2.2]                             |
|                                        | cytochrome c oxidase subunit VIb [EC:1.9.3.1]                                                  |
| Amino acid metabolism                  | F-type H <sup>+</sup> -transporting ATPase subunit d [EC:3.6.3.14]                             |
|                                        | alanine transaminase [EC:2.6.1.2]                                                              |
|                                        | alanyl-tRNA synthetase [EC:6.1.1.7]                                                            |
|                                        | arginase [EC:3.5.3.1]                                                                          |
|                                        | ornithine--oxo-acid transaminase [EC:2.6.1.13]                                                 |
|                                        | 1-pyrroline-5-carboxylate dehydrogenase [EC:1.5.1.12]                                          |
|                                        | arginyl-tRNA synthetase [EC:6.1.1.19]                                                          |
|                                        | asparagine synthase (glutamine-hydrolysing) [EC:6.3.5.4]                                       |
|                                        | asparaginyl-tRNA synthetase [EC:6.1.1.22]                                                      |
|                                        | aspartate aminotransferase [EC:2.6.1.1]                                                        |
|                                        | aspartyl-tRNA synthetase [EC:6.1.1.12]                                                         |
|                                        | cysteine dioxygenase [EC:1.13.1.20]                                                            |
|                                        | aspartate aminotransferase [EC:2.6.1.1]                                                        |
|                                        | cysteinyl-tRNA synthetase [EC:6.1.1.16]                                                        |
|                                        | glutamine synthetase [EC:6.3.1.2]                                                              |
| glutamyl-tRNA synthetase [EC:6.1.1.18] |                                                                                                |

glutamate dehydrogenase (NAD(P)+) [EC:1.4.1.3]  
glutamyl-tRNA synthetase [EC:6.1.1.17]  
glycine hydroxymethyltransferase [EC:2.1.2.1]  
glycyl-tRNA synthetase [EC:6.1.1.14]  
histidine ammonia-lyase [EC:4.3.1.3]  
urocanate hydratase [EC:4.2.1.49]  
imidazolonepropionase [EC:3.5.2.7]  
glutamate formiminotransferase [EC:2.1.2.5]  
histidyl-tRNA synthetase [EC:6.1.1.21]  
branched-chain amino acid aminotransferase [EC:2.6.1.42]  
2-oxoisovalerate dehydrogenase E1 component, alpha subunit [EC:1.2.4.4]  
2-oxoisovalerate dehydrogenase E2 component (dihydrolipoyl transacylase) [EC:2.3.1.168]  
dihydrolipoamide dehydrogenase [EC:1.8.1.4]  
acyl-CoA dehydrogenase [EC:1.3.99.3]  
enoyl-CoA hydratase [EC:4.2.1.17]  
3-hydroxyacyl-CoA dehydrogenase [EC:1.1.1.35]  
acetyl-CoA acyltransferase 2 [EC:2.3.1.16]  
propionyl-CoA carboxylase alpha chain [EC:6.4.1.3]  
methylmalonyl-CoA epimerase [EC:5.1.99.1]  
methylmalonyl-CoA mutase [EC:5.4.99.2]  
isoleucyl-tRNA synthetase [EC:6.1.1.5]  
branched-chain amino acid aminotransferase [EC:2.6.1.42]  
2-oxoisovalerate dehydrogenase E1 component, alpha subunit [EC:1.2.4.4]  
2-oxoisovalerate dehydrogenase E2 component (dihydrolipoyl transacylase) [EC:2.3.1.168]  
dihydrolipoamide dehydrogenase [EC:1.8.1.4]  
acyl-CoA dehydrogenase [EC:1.3.99.3]  
3-methylcrotonyl-CoA carboxylase alpha subunit [EC:6.4.1.4]  
methylglutaconyl-CoA hydratase [EC:4.2.1.18]  
hydroxymethylglutaryl-CoA lyase [EC:4.1.3.4]  
3-oxoacid CoA-transferase subunit A [EC:2.8.3.5]  
acetyl-CoA C-acetyltransferase [EC:2.3.1.9]  
leucyl-tRNA synthetase [EC:6.1.1.4]  
branched-chain amino acid aminotransferase [EC:2.6.1.42]  
2-oxoisovalerate dehydrogenase E1 component, alpha subunit [EC:1.2.4.4]  
2-oxoisovalerate dehydrogenase E2 component (dihydrolipoyl transacylase) [EC:2.3.1.168]  
dihydrolipoamide dehydrogenase [EC:1.8.1.4]  
acyl-CoA dehydrogenase [EC:1.3.99.3]  
enoyl-CoA hydratase [EC:4.2.1.17]  
3-hydroxyisobutyryl-CoA hydrolase [EC:3.1.2.4]  
3-hydroxyisobutyrate dehydrogenase [EC:1.1.1.31]  
aldehyde dehydrogenase (NAD+) [EC:1.2.1.3]  
methylmalonyl-CoA mutase [EC:5.4.99.2]  
valyl-tRNA synthetase [EC:6.1.1.9]  
saccharopine dehydrogenase (NAD+, L-lysine forming) [EC:1.5.1.7]  
saccharopine dehydrogenase (NAD+, L-glutamate forming) [EC:1.5.1.9]  
aminoadipate-semialdehyde dehydrogenase [EC:1.2.1.31]  
2-aminoadipate transaminase [EC:2.6.1.39]  
2-oxoglutarate dehydrogenase E1 component [EC:1.2.4.2]  
2-oxoglutarate dehydrogenase E2 component (dihydrolipoamide succinyltransferase) [EC:2.3.1.61]  
glutaryl-CoA dehydrogenase [EC:1.3.99.7]  
enoyl-CoA hydratase [EC:4.2.1.17]  
3-hydroxyacyl-CoA dehydrogenase [EC:1.1.1.35]  
acetyl-CoA C-acetyltransferase [EC:2.3.1.9]  
lysyl-tRNA synthetase, class II [EC:6.1.1.6]  
S-adenosylmethionine synthetase [EC:2.5.1.6]  
DNA (cytosine-5-)-methyltransferase [EC:2.1.1.37]  
adenosylhomocysteinase [EC:3.3.1.1]  
cystathionine beta-synthase [EC:4.2.1.22]  
cystathionine gamma-lyase [EC:4.4.1.1]  
2-oxobutanoate:ferredoxin 2-oxidoreductase (CoA-propanoylating) [EC:1.2.7.2]  
ferredoxin:NAD+ oxidoreductase [EC:1.18.1.3]  
propionyl-CoA carboxylase alpha chain [EC:6.4.1.3]  
methylmalonyl-CoA epimerase [EC:5.1.99.1]

methylmalonyl-CoA mutase [EC:5.4.99.2]  
 methionyl-tRNA synthetase [EC:6.1.1.10]  
 phenylalanine-4-hydroxylase [EC:1.14.16.1]  
 phenylalanyl-tRNA synthetase beta chain [EC:6.1.1.20]  
 pyrroline-5-carboxylate reductase [EC:1.5.1.2]  
 1-pyrroline-5-carboxylate dehydrogenase [EC:1.5.1.12]  
 prolyl-tRNA synthetase [EC:6.1.1.15]  
 L-serine dehydratase [EC:4.3.1.17]  
 seryl-tRNA synthetase [EC:6.1.1.11]  
 threonine dehydratase [EC:4.3.1.19]  
 2-oxobutanoate:ferredoxin 2-oxidoreductase (CoA-propanoylating) [EC:1.2.7.2]  
 ferredoxin:NAD+ oxidoreductase [EC:1.18.1.3]  
 propionyl-CoA carboxylase alpha chain [EC:6.4.1.3]  
 methylmalonyl-CoA epimerase [EC:5.1.99.1]  
 methylmalonyl-CoA mutase [EC:5.4.99.2]  
 threonyl-tRNA synthetase [EC:6.1.1.3]  
 tryptophan 2,3-dioxygenase [EC:1.13.11.11]  
 arylformamidase [EC:3.5.1.9]  
 kynurenine 3-monooxygenase [EC:1.14.13.9]  
 kynureninase [EC:3.7.1.3]  
 3-hydroxyanthranilate 3,4-dioxygenase [EC:1.13.11.6]  
 aminocarboxymuconate-semialdehyde decarboxylase [EC:4.1.1.45]  
 aminomuconate-semialdehyde dehydrogenase [EC:1.2.1.32]  
 Oxidoreductases [EC:1.5.1.-]  
 2-Oxoadipate:lipoamide 2-oxidoreductase(decarboxylating and acceptorsuccinylating) [EC:1.2.4.2]  
 glutaryl-CoA dehydrogenase [EC:1.3.99.7]  
 enoyl-CoA hydratase [EC:4.2.1.17]  
 3-hydroxyacyl-CoA dehydrogenase [EC:1.1.1.35]  
 acetyl-CoA C-acetyltransferase [EC:2.3.1.9]  
 tryptophanyl-tRNA synthetase [EC:6.1.1.2]  
 tyrosine aminotransferase [EC:2.6.1.5]  
 4-hydroxyphenylpyruvate dioxygenase [EC:1.13.11.27]  
 homogentisate 1,2-dioxygenase [EC:1.13.11.5]  
 maleylacetoacetate isomerase [EC:5.2.1.2]  
 fumarylacetoacetase [EC:3.7.1.2]  
 tyrosyl-tRNA synthetase [EC:6.1.1.1]  
 Carbohydrate synthesis UTP--glucose-1-phosphate uridylyltransferase [EC:2.7.7.9]  
 glycogen(starch) synthase [EC:2.4.1.11]  
 1,4-alpha-glucan branching enzyme [EC:2.4.1.18]  
 Purine biosynthesis ribose-phosphate pyrophosphokinase [EC:2.7.6.1]  
 amidophosphoribosyltransferase [EC:2.4.2.14]  
 phosphoribosylamine--glycine ligase [EC:6.3.4.13]  
 phosphoribosylglycinamide formyltransferase [EC:2.1.2.2]  
 phosphoribosylformylglycinamide synthase [EC:6.3.5.3]  
 phosphoribosylformylglycinamide cyclo-ligase [EC:6.3.3.1]  
 phosphoribosylaminoimidazole carboxylase [EC:4.1.1.21]  
 phosphoribosylaminoimidazole-succinocarboxamide synthase [EC:6.3.2.6]  
 adenylosuccinate lyase [EC:4.3.2.2]  
 phosphoribosylaminoimidazolecarboxamide formyltransferase [EC:2.1.2.3]  
 IMP dehydrogenase [EC:1.1.1.205]  
 GMP synthase (glutamine-hydrolysing) [EC:6.3.5.2]  
 guanylate kinase [EC:2.7.4.8]  
 nucleoside-diphosphate kinase [EC:2.7.4.6]  
 ribonucleoside-diphosphate reductase subunit M2 [EC:1.17.4.1]  
 nucleoside-diphosphate kinase [EC:2.7.4.6]  
 adenylosuccinate synthase [EC:6.3.4.4]  
 adenylosuccinate lyase [EC:4.3.2.2]  
 adenylate kinase [EC:2.7.4.3]  
 nucleoside-diphosphate kinase [EC:2.7.4.6]  
 ribonucleoside-diphosphate reductase subunit M2 [EC:1.17.4.1]  
 nucleoside-diphosphate kinase [EC:2.7.4.6]  
 Pyrimidine biosynthesis carbamoyl-phosphate synthase [EC:6.3.5.5]  
 aspartate carbamoyltransferase [EC:2.1.3.2]

Lipid metabolism

dihydroorotase [EC:3.5.2.3]  
dihydroorotate dehydrogenase [EC:1.3.5.2]  
orotate phosphoribosyltransferase [EC:2.4.2.10]  
orotidine-5'-phosphate decarboxylase [EC:4.1.1.23]  
cytidylate kinase [EC:2.7.4.14]  
nucleoside-diphosphate kinase [EC:2.7.4.6]  
CTP synthase [EC:6.3.4.2]  
ribonucleoside-diphosphate reductase subunit M2 [EC:1.17.4.1]  
nucleoside-diphosphate kinase [EC:2.7.4.6]  
ribonucleoside-diphosphate reductase subunit M2 [EC:1.17.4.1]  
dTMP kinase [EC:2.7.4.9]  
thymidylate synthase [EC:2.1.1.45]  
dTMP kinase [EC:2.7.4.9]  
nucleoside-diphosphate kinase [EC:2.7.4.6]  
DNA-directed RNA polymerase III subunit C31 [EC:2.7.7.6]  
DNA polymerase delta subunit 3  
acetyl-CoA carboxylase [EC:6.4.1.2]  
fatty acid synthase, animal type [EC:2.3.1.85]  
glycerol-3-phosphate O-acyltransferase [EC:2.3.1.15]  
1-acyl-sn-glycerol-3-phosphate acyltransferase [EC:2.3.1.51]  
phosphatidate phosphatase [EC:3.1.3.4]  
diacylglycerol O-acyltransferase 2-like protein 4 [EC:2.3.1.76]  
hydroxymethylglutaryl-CoA synthase [EC:2.3.3.10]  
3-hydroxy-3-methylglutaryl-CoA reductase [EC:1.1.1.34]  
mevalonate kinase [EC:2.7.1.36]  
phosphomevalonate kinase [EC:2.7.4.2]  
diphosphomevalonate decarboxylase [EC:4.1.1.33]  
isopentenyl-diphosphate delta-isomerase [EC:5.3.3.2]  
dimethylallyltranstransferase [EC:2.5.1.1]  
geranyltranstransferase [EC:2.5.1.10]  
farnesyl-diphosphate farnesyltransferase [EC:2.5.1.21]  
farnesyl-diphosphate farnesyltransferase [EC:2.5.1.21]  
squalene monooxygenase [EC:1.14.99.7]  
lanosterol synthase [EC:5.4.99.7]  
cytochrome P450, family 51, subfamily A (sterol 14-demethylase) [EC:1.14.13.70]  
delta14-sterol reductase [EC:1.3.1.70]  
methylsterol monooxygenase [EC:1.14.13.72]  
sterol-4alpha-carboxylate 3-dehydrogenase (decarboxylating) [EC:1.1.1.170]  
3-keto steroid reductase [EC:1.1.1.270]  
delta24-sterol reductase [EC:1.3.1.72]  
cholestenol delta-isomerase [EC:5.3.3.5]  
lathosterol oxidase [EC:1.14.21.6]  
7-dehydrocholesterol reductase [EC:1.3.1.21]  
sterol O-acyltransferase [EC:2.3.1.26]  
phosphatidate phosphatase [EC:3.1.3.4]  
diacylglycerol cholinephosphotransferase [EC:2.7.8.2]  
phosphatidylserine decarboxylase [EC:4.1.1.65]  
phosphatidylserine synthase 1 [EC:2.7.8.-]  
phosphatidate cytidyltransferase [EC:2.7.7.41]  
CDP-diacylglycerol--inositol 3-phosphatidyltransferase [EC:2.7.8.11]  
serine palmitoyltransferase [EC:2.3.1.50]  
3-dehydrosphinganine reductase [EC:1.1.1.102]  
Acyl-CoA-dependent ceramide synthase [EC:2.3.1.24]  
sphingolipid delta-4 desaturase [EC:1.14.-.-]  
ceramide cholinephosphotransferase [EC:2.7.8.3]

---
